# Supplementary material for: Effector gene birth in plant parasitic nematodes: Neofunctionalization of a housekeeping glutathione synthetase gene
Source: PLoS Genet. 2018 Apr 11;14(4):e1007310. doi: 10.1371/journal.pgen.1007310 (PMC5919673; doi:10.1371/journal.pgen.1007310)
Supplement: S1 Table — (XLSX) [file pgen.1007310.s008.xlsx]

## Sheet: Sheet1
Column1	Clade 1	Clade 2	Clade 3
Number of sequences	2 (1;1)	10 (5;5)	37 (22;15)
Percentage with at least one DOG box	50% (1;0)	20% (2;0)	70% (16;10)
Average DOG boxs per sequence	0.5	0.2	(1.32;1.30)
N.B. (G. pallida;G. rostochiensis)
